# Supplementary material for: Honokiol induces superoxide production by targeting mitochondrial respiratory chain complex I in Candida albicans
Source: PLoS One. 2017 Aug 30;12(8):e0184003. doi: 10.1371/journal.pone.0184003 (PMC5576747; doi:10.1371/journal.pone.0184003)
Supplement: S2 Table — (XLSX) [file pone.0184003.s002.xlsx]

## Sheet: Sheet1
GeneID	Fold Change	Gene name	Description
autophagy
orf19.3998	10.5235	IPF19441.2	Ortholog(s) have Atg8 ligase activity, protein binding, bridging activity and role in C-terminal protein lipidation, CVT pathway, macroautophagy, mitochondrion degradation, piecemeal microautophagy of nucleus
orf19.2848	8.34021	APG13	Predicted regulatory subunit of the Atg1 signaling complex; required for vesicle formation during autophagy and the cytoplasm-to-vacuole targeting (Cvt) pathway; Spider biofilm induced
orf19.7196	6.78668	PRB1	Putative vacuolar protease; upregulated in the presence of human neutrophils; Spider biofilm induced
orf19.6950	6.54286	PRB1	Putative vacuolar membrane transporter for cationic amino acids; Spider biofilm induced
orf19.2480.1	4.87374	ATG8	Putative autophagosome protein; macrophage/pseudohyphal-repressed; alternatively spliced intron in 5' UTR; Spider biofilm induced
orf19.1727	3.83243	PMC1	Vacuolar calcium P-type ATPase; transcript regulated by calcineurin and fluconazole; mutant shows increased resistance to fluconazole, lithium; increased sensitivity to calcium; Spider biofilm induced
orf19.3841	3.47725	ATG1	Putative protein serine/threonine kinase; predicted role in vesicle formation in autophagy and the cytoplasm-to-vacuole targeting (Cvt) pathway; Spider biofilm induced
orf19.4614	3.07385	ATG11	Adapter protein for pexophagy and the cytoplasm-to-vacuole targeting (Cvt) pathway; Spider biofilm induced
orf19.4307	2.78043	DID2	Ortholog(s) have role in late endosome to vacuole transport via multivesicular body sorting pathway, protein targeting to vacuole and late endosome localization
orf19.4339	2.76379	VPS4	AAA-ATPase involved in transport from MVB to the vacuole and ESCRT-III complex disassembly; mutation decreases SAP secretion and virulence in murine intravenous infection; regulated by Gcn2p, Gcn4p; required for normal Rim8p processing
orf19.2343.1	2.73888	orf19.2343.1	Putative vacuolar H+ ATPase subunit e of the V-ATPase V0 subcomplex; added to Assembly 21 based on comparative genome analysis
orf19.3606	2.6906	IPF5204.2	Ortholog of S. cereviae Sna4 vacuolar outer membrane protein that plays a role in sensitivity to NA+; induced by Mnl1 under weak acid stress
orf19.6031	2.66206	VPS27	Putative ESCRT-0 complex protein with a role in multivesicular body (MVB) trafficking
orf19.1166	2.30231	CTA3	Protein similar to S. cerevisiae Ede1p, which is involved in endocytosis; activates transcription in 1-hybrid assay in S. cerevisiae
orf19.5322	2.2558	ATG27	Ortholog(s) have phosphatidylinositol-3-phosphate binding activity and role in CVT pathway, autophagic vacuole assembly, peroxisome degradation, protein localization to pre-autophagosomal structure, vesicle organization
orf19.4090.1	2.22674	VMA21	Ortholog(s) have role in vacuolar proton-transporting V-type ATPase complex assembly and endoplasmic reticulum membrane localization
orf19.3999	2.16475	orf19.3999	Ortholog(s) have fungal-type vacuole membrane localization
orf19.5974	2.15432	ATG9	Protein similar to S. cerevisiae Atg9; required for early step in autophagy; required for cytoplasm to vacuole trafficking of Lap41; Spider biofilm induced
orf19.4119	2.14378	SPO72	Protein described as similar to S. cerevisiae sporulation protein; ortholog of S. cerevisiae Atg2, an autophagic vesicle formation protein; up-regulation associated with azole resistance; Spider biofilm induced
orf19.5539	2.11129	orf19.5539	Ortholog(s) have role in retrograde vesicle-mediated transport, Golgi to ER and SNARE complex, integral to cytosolic side of endoplasmic reticulum membrane localization
orf19.2209	-3.57689	YVC1	Putative vacuolar cation channel shock; repressed by alpha pheromone in SpiderM medium; flow model biofilm repressed
proteolysis and protein degradation
orf19.3998	10.5235	orf19.3998	Ortholog(s) have Atg8 ligase activity, protein binding, bridging activity and role in C-terminal protein lipidation, CVT pathway, macroautophagy, mitochondrion degradation, piecemeal microautophagy of nucleus
orf19.5337	9.53145	UBC15	Putative E2 ubiquitin-conjugating enzyme
orf19.2848	8.34021	APG13	Predicted regulatory subunit of the Atg1 signaling complex; required for vesicle formation during autophagy and the cytoplasm-to-vacuole targeting (Cvt) pathway; Spider biofilm induced
orf19.6272	7.7373	YUH1	Putative ubiquitin C-terminal hydrolase; regulated by Gcn2p and Gcn4p
orf19.7571	7.34594	UBC4	Ortholog(s) have ubiquitin binding activity
orf19.350	7.12655	PRE9	Alpha3 (C9) subunit of the 20S proteasome; transcript regulated by Mig1; flow model biofilm repressed
orf19.4540	6.2319	UBC8	Predicted ubiquitin-conjugating enzyme that negatively regulates gluconeogenesis by mediating the glucose-induced ubiquitination of fructose-1,6-bisphosphatase; induced by alpha pheromone in SpiderM medium
orf19.7010	5.28773	orf19.7010	Ortholog(s) have cytosol, ubiquitin ligase complex localization
orf19.2480.1	4.87374	AUT7	Putative autophagosome protein; macrophage/pseudohyphal-repressed; alternatively spliced intron in 5' UTR; Spider biofilm induced
orf19.2498	4.72628	SAN1	Predicted ubiquitin-protein ligase; Hap43-repressed gene; oxidative stress-induced via Cap1; flow model biofilm induced
orf19.5752	4.70396	orf19.5752	Ortholog(s) have ubiquitin-protein ligase activity, role in SCF-dependent proteasomal ubiquitin-dependent protein catabolic process and SCF ubiquitin ligase complex localization
orf19.432	4.2538	orf19.432	Predicted SCF ubiquitin ligase complex protein; Spider biofilm induced; rat catheter biofilm induced
orf19.4430	3.97578	orf19.4430	Ortholog(s) have ubiquitin binding activity, role in proteasomal ubiquitin-dependent protein catabolic process and cytoplasm, nucleus localization
orf19.4102	3.70253	RPN10	Putative 19S regulatory particle of the 26S proteasome; macrophage/pseudohyphal-repressed; regulated by Gcn2 and Gcn4; Spider biofilm repressed
orf19.3054	3.5715	RPN3	Putative non-ATPase regulatory subunit of the 26S proteasome lid; amphotericin B repressed; oxidative stress-induced via Cap1p
orf19.3661	3.53388	UBP16	Putative deubiquitinating enzyme; induced by Mnl1 under weak acid stress
orf19.6063	3.48721	UBP6	Putative ubiquitin-specific protease of the 26S proteasome; oxidative stress-induced via Cap1p
orf19.3841	3.47725	ATG1	Putative protein serine/threonine kinase; predicted role in vesicle formation in autophagy and the cytoplasm-to-vacuole targeting (Cvt) pathway; Spider biofilm induced
orf19.522	3.30093	PIM1	ATP-dependent Lon protease; role in degradation of misfolded proteins in mitochondria, biogenesis and maintenance of mitochondria; rat catheter biofilm induced
orf19.6319	3.11526	UBP3	Ortholog(s) have mRNA binding, ubiquitin-specific protease activity and role in protein deubiquitination, regulation of ER to Golgi vesicle-mediated transport, regulation of response to osmotic stress, ribophagy
orf19.213	2.93876	RPN12	Ortholog(s) have role in ubiquitin-dependent protein catabolic process and nucleus, proteasome regulatory particle, lid subcomplex, proteasome storage granule localization
orf19.2933	2.81059	orf19.2933	Ortholog(s) have ubiquitin-specific protease activity, role in protein deubiquitination, regulation of transcription, DNA-dependent and cytosol, nucleus localization
orf19.3815	2.7598	UBP7	Has domain(s) with predicted ubiquitin thiolesterase activity and role in ubiquitin-dependent protein catabolic process
orf19.2379	2.68462	NOT4	Putative E3 ubiquitin-protein ligase; required for maintenance, but not induction, of hyphal development; homozygous null mutant is avirulent in mouse systemic infection despite persistence in host; repressed in rat oral candidiasis
orf19.1336	2.62505	PUP3	Putative beta 3 subunit of the 20S proteasome; macrophage/pseudohyphal-repressed
orf19.6582	2.49839	PRE10	Alpha7 (C8) subunit of the 20S proteasome; multiple phosphorylated residues; transcript induced upon filamentous growth; Spider biofilm repressed
orf19.3087	2.49154	UBI3	Fusion of ubiquitin with the S34 protein of the small ribosomal subunit; mRNA decreases upon heat shock, appears to be degraded; functional homolog of S. cerevisiae RPS31; Hap43-induced; Spider biofilm repressed
orf19.5094	2.48641	BUL1	Protein similar but not orthologous to S. cerevisiae Bul1; a protein involved in selection of substrates for ubiquitination; mutants are viable; macrophage/pseudohyphal-induced; rat catheter biofilm induced
orf19.5260	2.45426	RPN2	Putative 26S proteasome subunit; transcript regulated by Mig1; caspofungin repressed; regulated by Gcn2 and Gcn4; gene used for strain identification by multilocus sequence typing
orf19.2755	2.3925	orf19.2755	Ortholog(s) have role in proteasomal ubiquitin-dependent protein catabolic process, proteasomal ubiquitin-independent protein catabolic process and cytosol, nucleus, proteasome core complex, beta-subunit complex localization
orf19.5440	2.36954	RPT2	Putative ATPase of the 19S regulatory particle of the 26S proteasome; oxidative stress-induced via Cap1; Spider biofilm repressed
orf19.7367	2.3265	UBP1	Ortholog(s) have ubiquitin-specific protease activity, role in protein deubiquitination and endoplasmic reticulum localization
orf19.7335	2.31342	PRE8	Putative alpha-2_sc subunit of proteasome; macrophage-induced protein; regulated by Gcn2p and Gcn4p; transcription is positively regulated by Tbf1p; stationary phase enriched protein
orf19.5965	2.15576	UFD2	Ortholog(s) have ubiquitin-ubiquitin ligase activity, role in ER-associated protein catabolic process, protein ubiquitination, response to stress and cytoplasm, nucleus localization
orf19.5974	2.15432	ATG9	Protein similar to S. cerevisiae Atg9; required for early step in autophagy; required for cytoplasm to vacuole trafficking of Lap41; Spider biofilm induced
orf19.4956	2.15209	RPN1	Putative 19S regulatory particle of the 26S proteasome; regulated by Gcn2p and Gcn4p
orf19.5961	2.13455	NAS6	Ortholog(s) have role in proteasome regulatory particle assembly, proteolysis and cytosol, nucleus, proteasome regulatory particle localization
orf19.7412	2.12197	MUB1	Predicted protein required for ubiquitination; role in meiosis, regulation of cell budding in S. cereviae; Spider biofilm induced
orf19.709	2.11089	PUP2	Alpha5 subunit of the 20S proteasome; macrophage/pseudohyphal-repressed; regulated by Gcn2p and Gcn4p; protein present in exponential and stationary growth phase yeast cultures
orf19.50	2.10125	orf19.50	Ortholog(s) have role in SCF-dependent proteasomal ubiquitin-dependent protein catabolic process, cellular response to methylmercury, response to DNA damage stimulus and SCF ubiquitin ligase complex, cytosol, nucleus localization
orf19.3041	-2.81778	orf19.3041	Ortholog(s) have ubiquitin protein ligase binding activity
ribosome biogenesis
orf19.5991	0.370863		Ortholog(s) have role in maturation of 5.8S rRNA from tricistronic rRNA transcript (SSU-rRNA, 5.8S rRNA, LSU-rRNA), maturation of LSU-rRNA from tricistronic rRNA transcript (SSU-rRNA, 5.8S rRNA, LSU-rRNA)
orf19.6014	0.357816	RRS1	Putative ribosome biogenesis and nuclear export protein; Hap43p-induced gene; mutation confers hypersensitivity to 5-fluorocytosine (5-FC), 5-fluorouracil (5-FU), and tubercidin (7-deazaadenosine)
orf19.1902	0.246435	NOC4	Putative nucleolar protein; Hap43-induced; mutation confers resistance to 5-fluorocytosine (5-FC), 5-fluorouracil (5-FU), and tubercidin (7-deazaadenosine); Spider biofilm induced
orf19.6234	0.220414		Putative U2 snRNP component; mutation confers hypersensitivity to 5-fluorocytosine (5-FC), 5-fluorouracil (5-FU), and tubercidin (7-deazaadenosine); Hap43-induced, Spider biofilm induced
orf19.1566	0.351255	UTP21	Putative U3 snoRNP protein; Hap43-induce; physically interacts with TAP-tagged Nop1; Spider biofilm induced
orf19.5010	0.311604	DIM1	Putative 18S rRNA dimethylase; predicted role in rRNA modification and processing; Hap43-induced; likely to be essential for growth based on insertional mutagenesis strategy; F-12/CO2 early biofilm induced
orf19.6298	0.376589	SPB4	Putative ATP-dependent RNA helicase; flucytosine repressed; Spider biofilm induced
orf19.4815	0.300436	YTM1	Protein similar to S. cerevisiae Ytm1p, which is involved in biogenesis of the large ribosomal subunit; transposon mutation affects filamentous growth; protein level decreases in stationary phase cultures; Hap43p-induced gene
orf19.7384	0.32992	NOG1	Putative GTPase; mutation confers hypersensitivity to 5-fluorocytosine (5-FC), 5-fluorouracil (5-FU), and tubercidin (7-deazaadenosine); repressed by prostaglandins; Hap43-induced
orf19.661	0.281967	KRR1	Putative nucleolar protein; repressed benomyl treatment or in an azole-resistant strain that overexpresses MDR1; F-12/CO2 early biofilm induced
orf19.6828	0.266513		Ortholog(s) have role in rRNA processing and nucleolus, preribosome, large subunit precursor localization
orf19.603	0.328839	IMP4	Putative SSU processome component; Hap43-induced; repressed by prostaglandins; Spider biofilm induced
orf19.6652	0.344332	DBP8	Protein similar to S. cerevisiae Dbp8p, an ATP-dependent helicase involved in rRNA processing; oxidative stress-repressed via Cap1p; flucytosine repressed; likely to be essential for growth, based on insertional mutagenesis
orf19.6873	0.372187	RPS8A	Small 40S ribosomal subunit protein; induced by ciclopirox olamine; repressed upon phagocytosis by murine macrophage; 5'-UTR intron; Hap43-induced; Spider biofilm repressed
orf19.2712	0.342176	HCA4	Putative role in regulation of cell wall biogenesis; Hap43p-induced gene; possibly an essential gene, disruptants not obtained by UAU1 method; flow model and rat catheter biofilm induced
orf19.3087	2.49154	UBI3	Fusion of ubiquitin with the S34 protein of the small ribosomal subunit; mRNA decreases upon heat shock, appears to be degraded; functional homolog of S. cerevisiae RPS31; Hap43-induced; Spider biofilm repressed
orf19.1646	0.36277		Ortholog(s) have rRNA primary transcript binding activity
orf19.4093	0.332623	PES1	Pescadillo homolog required for yeast cell growth, lateral yeast growth on filamentous cells and virulence in mice; hyphal cells grow normally in mutant; mutation confers hypersensitivity to 5-fluorocytosine, 5-fluorouracil, tubercidin
orf19.5550	0.350888	MRT4	Putative mRNA turnover protein; Hap43-induced; mutation confers hypersensitivity to tubercidin (7-deazaadenosine); rat catheter biofilm induced
orf19.2185	0.213194	NSA1	Putative 66S pre-ribosomal particles conmponent; Hap43-induced; repressed by prostaglandins
orf19.6975	0.382286	YST1	Ribosome-associated protein; antigenic in mice; complements S. cerevisiae yst1 yst2 mutant; similar to laminin receptor; predicted S/T phosphorylation, N-glycosylation, myristoylation, Hap43-, Gcn4-regulated; Spider biofilm repressed
orf19.3393	0.360268		Putative DEAD-box helicase; Hap43-induced; Spider biofilm induced
orf19.665	0.369235	NEP1	Ortholog(s) have rRNA (pseudouridine) methyltransferase activity
orf19.1886	0.341216	RCL1	Putative U3-containing 90S preribosome processome complex subunit; Hap43-induced; essential; S. cerevisiae ortholog is essential; represses in core stress response;
orf19.6417	0.306769	TSR1	Component of 20S pre-rRNA processing unit; repressed by prostaglandins
orf19.1199	0.326183	NOP5	Ortholog of S. cerevisiae Nop58; involved in pre-rRNA process; Tn mutation affects filamentous growth; macrophage/pseudohyphal-induced; physically interacts with TAP-tagged Nop1; Spider biofilm repressed
orf19.6002	0.303777	RPL8B	Predicted ribosomal protein; regulated upon yeast-hypha switch; repressed upon phagocytosis by murine macrophage; Spider biofilm repressed
orf19.2311	0.248321	RPL82	Predicted ribosomal protein; genes encoding cytoplasmic ribosomal subunits, translation factors, and tRNA synthetases are downregulated upon phagocytosis by murine macrophage
orf19.3778	0.321302		Protein with a predicted role in ribosome biogenesis; mutation confers hypersensitivity to 5-fluorocytosine (5-FC), 5-fluorouracil (5-FU); repressed in core stress response; repressed by prostaglandins; Hap43-induced
orf19.1164	0.310158	GAR1	Putative H/ACA snoRNP pseudouridylase complex protein; mutation confers hypersensitivity to tubercidin (7-deazaadenosine); macrophage/pseudohyphal-induced; Spider biofilm repressed
orf19.1388	0.367879		Putative 66S pre-ribosomal particle component; Hap43-induced; F-12/CO2 early biofilm induced
